# Supplementary material for: ROS-responsive PPGF nanofiber membrane as a drug delivery system for long-term drug release in attenuation of osteoarthritis
Source: PubMed Central journal article supplement (PMC9630282; doi:10.1038/s41536-022-00254-3), 2022-11-03
Supplement: 41536_2022_254_MOESM1_ESM.pdf [file 41536_2022_254_MOESM1_ESM.pdf]

## Supplementary information

### ROS-responsive PPGF Nanofiber Membrane as a Drug Delivery System for Long-term Drug Release in Attenuation of Osteoarthritis

Jianjun Wu<sup>#1,2</sup>, Zainen Qin<sup>#1,2,3</sup>, Xianfang Jiang<sup>#4</sup>, Depeng Fang<sup>1,2</sup>, Zhenhui Lu<sup>\*1,2,3</sup>, Li Zheng<sup>\*1,2,3</sup>, Jinmin Zhao<sup>\*1,2,5</sup>

**Jianjun Wu, Zaineng Qin and Xianfang Jiang contributed equally to this work.**

**\* Co-Corresponding authors:** Zhenhui Lu (Zhenhuilu1989@163.com), Li Zheng (zhengli224@163.com) and Jinmin Zhao (zhaojinmin@126.com)

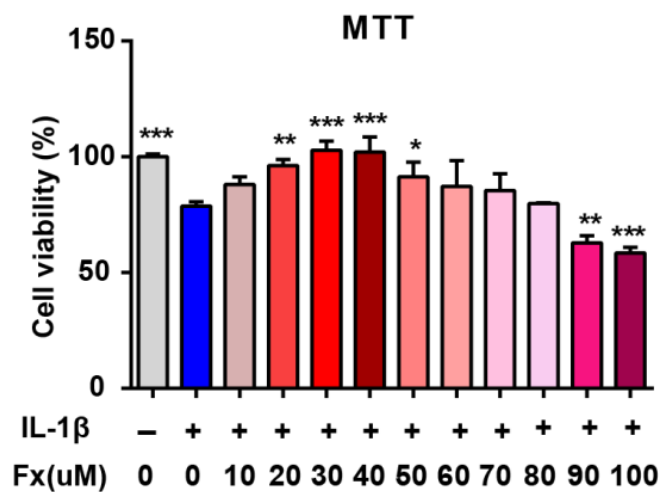

**Supplementary Fig. 1** The cytotoxicity of Fx detected by MTT assay.

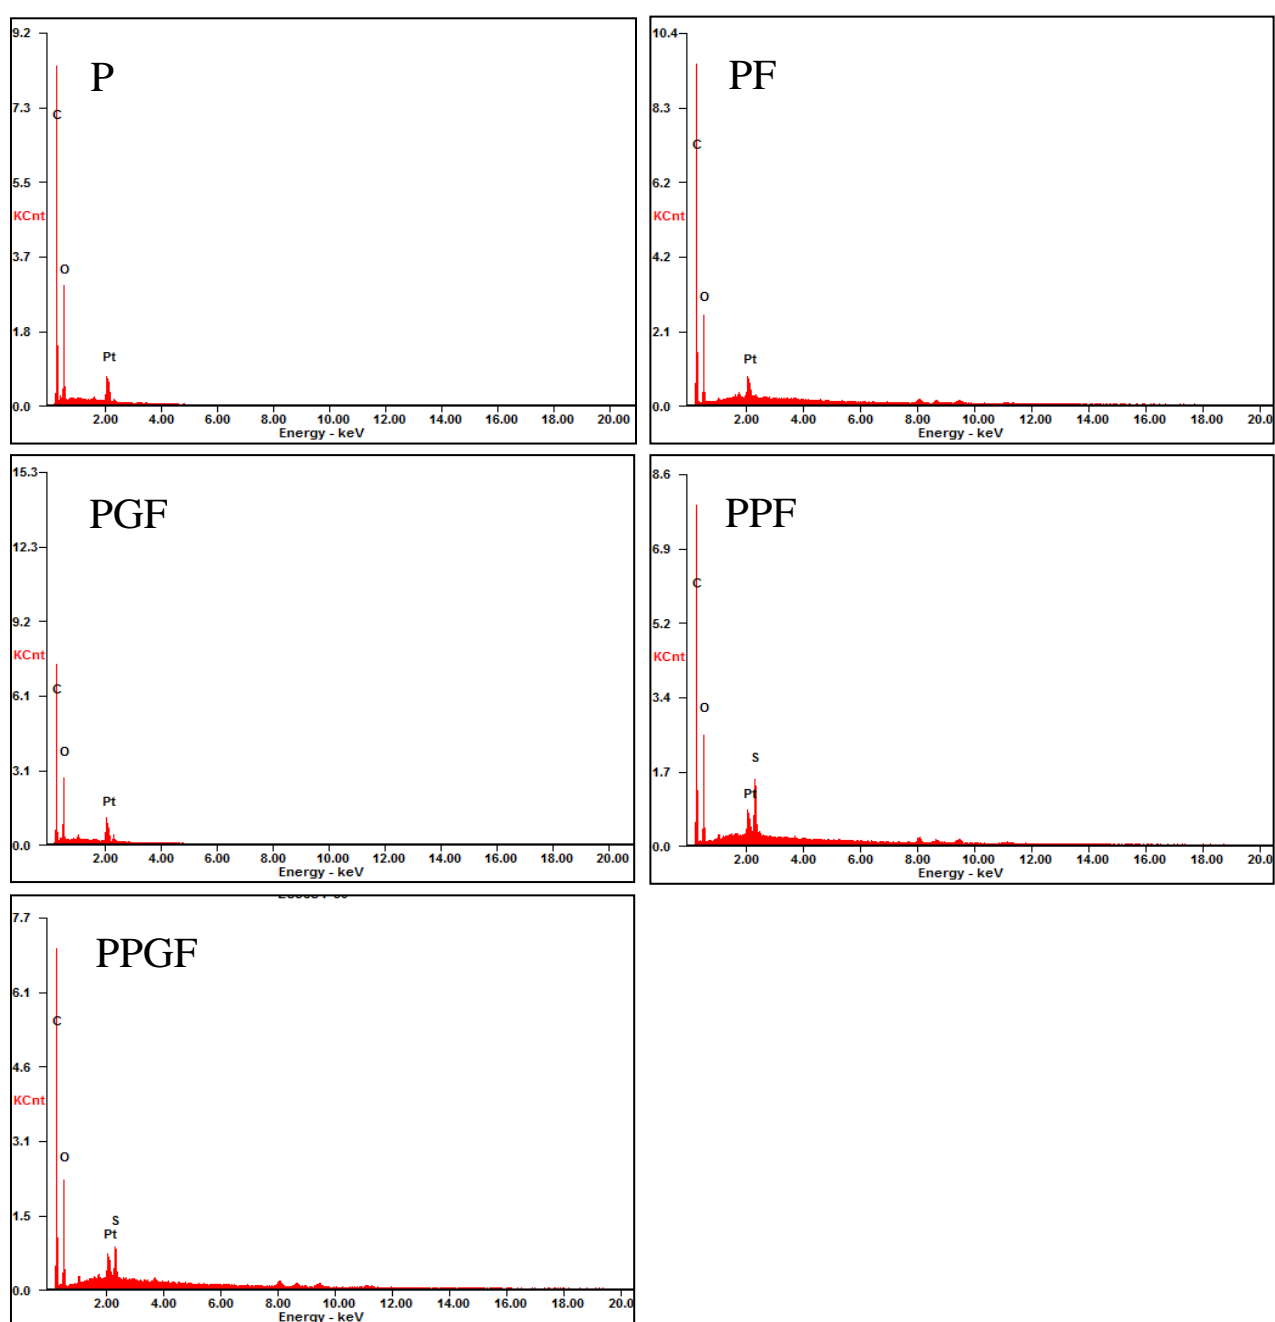

**Supplementary Fig. 2** Energy-dispersive spectrometry (EDS) spectrum of nanofiber membranes.

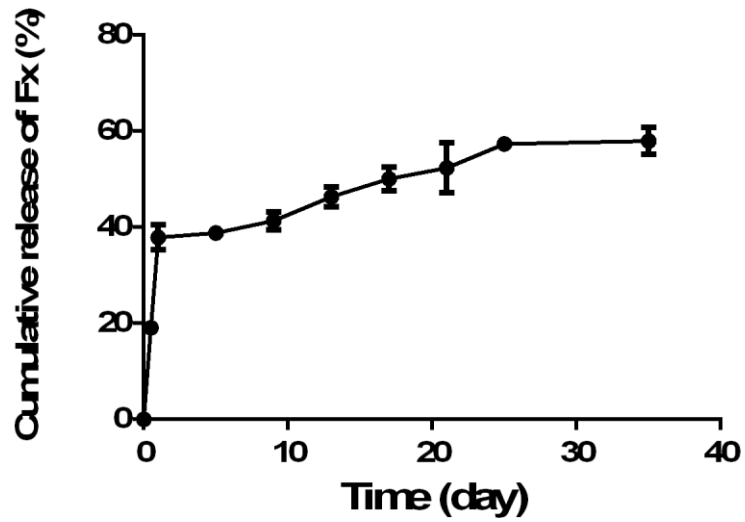

**Supplementary Fig. 3** The release profile of Fx from the rGO.

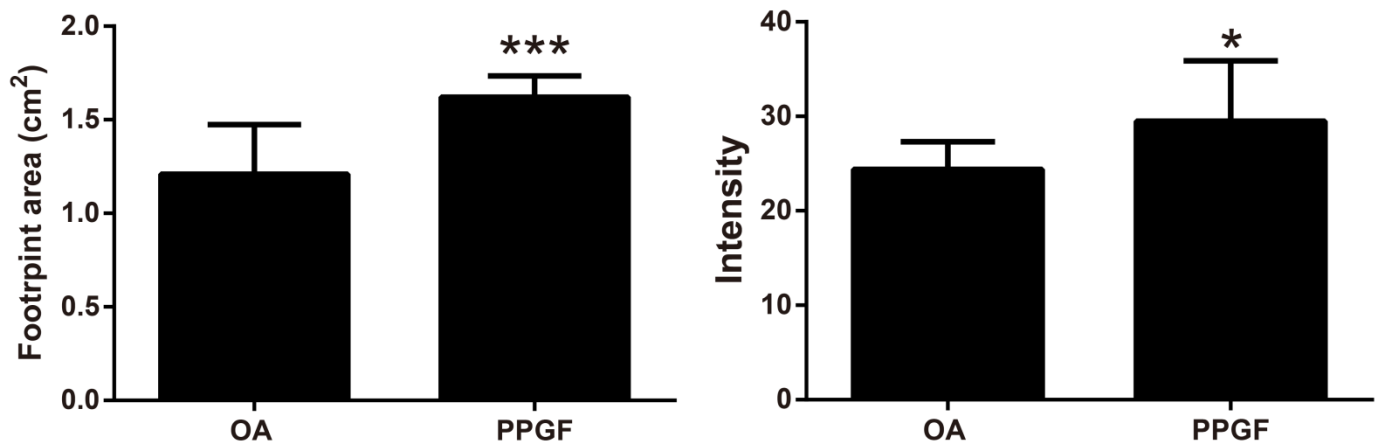

**Supplementary Fig. 4** Footprint area and intensity after therapy for 4 weeks were recorded and analyzed by VisuGait software (Mean  $\pm$  SD, n=5; \* means  $p < 0.05$ , \*\*\* means  $p < 0.001$ ).
